# Supplementary material
Source: ML conference proceedings conference paper supplement (https://openaccess.thecvf.com/content/ICCV2023/html/Qing_Disentangling_Spatial_and_ICCV_2023_paper.html)
Supplement: Supplementary file 1 [file Qing_Disentangling_Spatial_and_ICCV_2023_supplemental.pdf]

# Supplementary Materials for DiST

Zhiwu Qing<sup>1</sup> Shiwei Zhang<sup>2\*</sup> Ziyuan Huang<sup>3</sup> Yingya Zhang<sup>2</sup>  
 Changxin Gao<sup>1</sup> Deli Zhao<sup>2</sup> Nong Sang<sup>1\*</sup>

<sup>1</sup>Key Laboratory of Image Processing and Intelligent Control

School of Artificial Intelligence and Automation, Huazhong University of Science and Technology

<sup>2</sup>Alibaba Group <sup>3</sup>ARC, National University of Singapore

{qzw, cgao, nsang}@hust.edu.cn {zhangjin.zsw, yingya.zyy}@alibaba-inc.com

ziyuan.huang@u.nus.edu zhaodeli@gmail.com

## Overview

In this supplementary material, we first provide more ablation studies, and comparison with state-of-the-art approaches on zero-shot task and video recognition task in Sec. 1. Then, the implementation details for SSV2, K400 and EK100 are presented in Sec. 2.

## 1. Additional Results

### 1.1. Ablation Studies

| Method          | Pretraining  | Frozen | SSV2        | K400        |
|-----------------|--------------|--------|-------------|-------------|
| EVL [15]        | ImageNet-21k | ✓      | N/A         | 75.4        |
| ST-Adapter [18] | ImageNet-21k | ✓      | 62.8        | 76.6        |
| TimeSformer [2] | ImageNet-21k | ✗      | 59.5        | 78.0        |
| X-ViT [3]       | ImageNet-21k | ✗      | 64.4        | 78.5        |
| <b>DiST</b>     | ImageNet-21k | ✓      | <b>66.8</b> | <b>79.8</b> |
| EVL [15]        | CLIP         | ✓      | 61.0        | 82.9        |
| ST-Adapter [18] | CLIP         | ✓      | 66.3        | 82.0        |
| <b>DiST</b>     | CLIP         | ✓      | <b>68.7</b> | <b>83.6</b> |

Table A1: Comparison with state-of-the-art under different pre-trained image encoders.

**Fine-tuning with ImageNet pretrained models.** In fact, our DiST is not limited to CLIP pre-trained image models, and thus we have attempted to explore fine-tuning video models based on ImageNet supervised pre-training by following existing methods [15, 18]. As shown in Tab. A1, DiST outperforms the similar frozen CLIP-based fine-tuning method, *i.e.*, EVL [15] by 4.4%. Compared to the adapter-based approach, *i.e.*, ST-Adapter [18], we exceed by 4.0% and 2.2% on SSV2 and K400 datasets, respectively. Besides, DiST also shows performance advantages over full fine-tuning methods, such as TimeSformer [2] and X-ViT [3]. These results indicate that DiST is a more general network for image-to-video transfer learning.

| Frame | 1-4 | 5-8 | 9-12 | SSV2        | K400        |
|-------|-----|-----|------|-------------|-------------|
| ✗     | ✗   | ✗   | ✓    | 66.0        | 83.0        |
| ✗     | ✗   | ✓   | ✓    | 67.8        | 83.3        |
| ✗     | ✓   | ✓   | ✓    | 68.0        | 83.4        |
| ✓     | ✓   | ✓   | ✓    | <b>68.7</b> | <b>83.6</b> |

Table A2: Different layer of features.

**Different depth features.** As shown in Tab. A2, if only using the deep features (*i.e.*, 9-12) of ViT, its performance on the temporally heavy dataset (*i.e.*, SSV2) is weak. Nevertheless, the introduction of low-level features can bring up to 2.8% gains at most. This implies that the rich temporal details in the lower-level features are more beneficial for spatio-temporal learning.

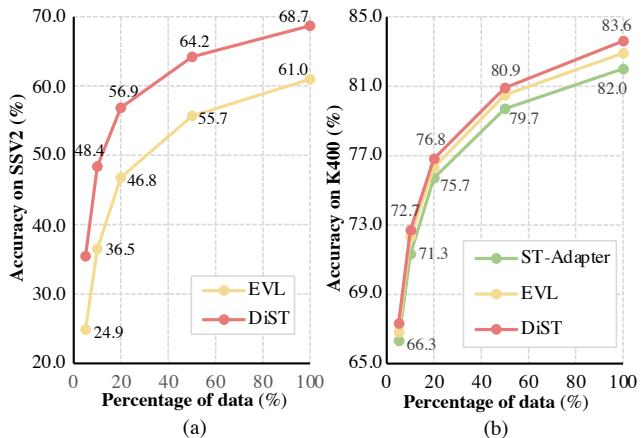

Figure A1: Performance comparison on varying training data scales.

**Data efficiency.** Data efficiency refers to the utilization efficiency of limited data by fine-tuning the models with only a portion of the training data. In Fig. A1, DiST and other clip-

| Method                                     | Pre-train    | Architecture | Input Size        | FLOPs×Cr.×Cl. (T)        | Param (M) | Frozen | Top-1       | Top-5       |
|--------------------------------------------|--------------|--------------|-------------------|--------------------------|-----------|--------|-------------|-------------|
| SlowFast [8]                               | ImageNet-21K | R101+NL      | $16 \times 224^2$ | $0.1 \times 3 \times 1$  | 60        | ✗      | 63.1        | 87.6        |
| ViViT FE [1]                               | IN21K+K400   | ViT-L        | $16 \times 224^2$ | $1.0 \times 3 \times 4$  | 612       | ✗      | 65.4        | 89.8        |
| TAdaConvNeXt-T [10]                        | ImageNet-1K  | ConvNeXt-T   | $32 \times 224^2$ | $0.1 \times 3 \times 2$  | 38        | ✗      | 67.1        | 90.4        |
| MTV-B(320p) [24]                           | IN21K+K400   | -            | $32 \times 224^2$ | $0.9 \times 3 \times 4$  | 310       | ✗      | 68.5        | 90.4        |
| MViT [7]                                   | Kinetics-600 | MViT-B-24    | $32 \times 224^2$ | $0.2 \times 3 \times 1$  | 53        | ✗      | 68.7        | 91.5        |
| Video Swin [16]                            | IN21K+K400   | Swin-B       | $32 \times 224^2$ | $0.3 \times 3 \times 1$  | 60        | ✗      | 69.6        | 92.7        |
| UnifromerV2 [14]                           | CLIP-400M    | ViT-B        | $32 \times 224^2$ | $0.37 \times 1 \times 3$ | 163       | ✗      | 70.7        | 93.2        |
| EVL [15]                                   | CLIP-400M    | ViT-B        | $32 \times 224^2$ | $0.68 \times 1 \times 3$ | 175       | ✓      | 62.4        | -           |
| ST-Adapter [18]                            | CLIP-400M    | ViT-B        | $32 \times 224^2$ | $0.61 \times 1 \times 3$ | 93        | ✓      | 69.5        | <b>92.6</b> |
| DiST <sub><math>\gamma=2</math></sub> [15] | CLIP-400M    | ViT-B        | $8 \times 224^2$  | $0.16 \times 1 \times 3$ | 105       | ✓      | 68.7        | 91.1        |
| DiST <sub><math>\gamma=2</math></sub> [15] | CLIP-400M    | ViT-B        | $16 \times 224^2$ | $0.32 \times 1 \times 3$ | 105       | ✓      | 70.2        | 92.0        |
| DiST <sub><math>\gamma=2</math></sub> [15] | CLIP-400M    | ViT-B        | $32 \times 224^2$ | $0.65 \times 1 \times 3$ | 105       | ✓      | <b>70.9</b> | 92.1        |
| UnifromerV2 [14]                           | CLIP-400M    | ViT-L        | $32 \times 224^2$ | $1.73 \times 1 \times 3$ | 574       | ✗      | 73.0        | 94.5        |
| TAdaFormer [11]                            | CLIP-400M    | ViT-L        | $32 \times 224^2$ | $1.70 \times 2 \times 3$ | 364       | ✗      | 73.6        | -           |
| EVL [15]                                   | CLIP-400M    | ViT-L        | $32 \times 224^2$ | $3.21 \times 1 \times 3$ | 654       | ✓      | 66.7        | -           |
| ST-Adapter [18]                            | CLIP-400M    | ViT-L        | $32 \times 224^2$ | $2.75 \times 1 \times 3$ | 347       | ✓      | 72.3        | <b>93.9</b> |
| DiST <sub><math>\gamma=2</math></sub> [15] | CLIP-400M    | ViT-L        | $8 \times 224^2$  | $0.71 \times 1 \times 3$ | 336       | ✓      | 70.8        | 92.3        |
| DiST <sub><math>\gamma=2</math></sub> [15] | CLIP-400M    | ViT-L        | $16 \times 224^2$ | $1.42 \times 1 \times 3$ | 336       | ✓      | 72.5        | 93.0        |
| DiST <sub><math>\gamma=2</math></sub> [15] | CLIP-400M    | ViT-L        | $32 \times 224^2$ | $2.83 \times 1 \times 3$ | 336       | ✓      | <b>73.1</b> | 93.2        |
| EVL [15]                                   | CLIP-400M    | ViT-L        | $32 \times 336^2$ | $8.08 \times 1 \times 3$ | 654       | ✓      | 68.0        | -           |
| DiST <sub><math>\gamma=2</math></sub> [15] | CLIP-400M    | ViT-L        | $8 \times 336^2$  | $1.66 \times 1 \times 3$ | 336       | ✓      | 71.2        | 92.5        |
| DiST <sub><math>\gamma=2</math></sub> [15] | CLIP-400M    | ViT-L        | $16 \times 336^2$ | $3.32 \times 1 \times 3$ | 336       | ✓      | 72.6        | 93.0        |
| DiST <sub><math>\gamma=2</math></sub> [15] | CLIP-400M    | ViT-L        | $32 \times 336^2$ | $6.64 \times 1 \times 3$ | 336       | ✓      | <b>73.3</b> | <b>93.5</b> |

Table A3: Comparison with the state-of-the-art methods on Something-Something V2. “Cr.” and “Cl.” are the abbreviation for “spatial crops” and “temporal clips”. “Frozen” indicates freezing the CLIP pre-trained parameters.

based pre-training methods [18, 15] are compared in terms of data efficiency on SSV2 and K400 datasets. As can be seen, our DiST exhibits consistent advantages over existing ST-Adapter [18] and EVL [15] across different proportions of training data. Especially on the temporally dependent dataset, *i.e.*, SSV2, DiST demonstrates improvements of approximately 10% over EVL [15] with fewer training scales. This suggests that DiST is easier to fine-tune and shows better generalization capability.

| Method                                      | Model | Frames                 | HMDB51                           | UCF101                           |
|---------------------------------------------|-------|------------------------|----------------------------------|----------------------------------|
| ActionCLIP [21]                             | B/16  | $32 \times 1 \times 1$ | $40.8 \pm 5.4$                   | $58.3 \pm 3.4$                   |
| X-CLIP [17]                                 | B/16  | $32 \times 1 \times 1$ | $44.6 \pm 5.2$                   | $72.0 \pm 2.3$                   |
| DiST <sub><math>\gamma=2</math></sub> [15]  | B/16  | $32 \times 1 \times 1$ | $55.4 \pm 1.2$                   | $72.3 \pm 0.6$                   |
| †DiST <sub><math>\gamma=2</math></sub> [15] | B/16  | $32 \times 1 \times 1$ | $57.4 \pm 0.9$                   | $73.2 \pm 0.6$                   |
| DiST <sub><math>\gamma=2</math></sub> [15]  | L/14  | $32 \times 1 \times 1$ | $57.5 \pm 1.6$                   | $74.9 \pm 0.8$                   |
| †DiST <sub><math>\gamma=2</math></sub> [15] | L/14  | $32 \times 1 \times 1$ | <b><math>61.8 \pm 1.3</math></b> | <b><math>75.8 \pm 0.7</math></b> |

Table A4: Zero-shot performance on HMDB51 [12] and UCF101 [19] across three splits. † indicates Kinetics-710 [13, 4, 5] pre-trained models.

## 1.2. Comparison with the state-of-the-art methods

**Zero-shot accuracy with Kinetics-710 pre-training.** We further evaluate the zero-shot performance of DiST on HMDB51 [12] and UCF101 [19] with the large-scale video dataset, *i.e.*, Kinetics-710 [13, 4, 5], pre-trained models. As shown in Tab. A4, we can observe that regardless of the model size, remarkable improvements can be achieved by fine-tuning our lightweight temporal encoder and integration branch on Kinetics-710. Particularly, on HMDB51 that relies on temporal information, the gains of ViT-B and ViT-L can reach 2.0% and 4.3%, respectively. This further demonstrates the scalability of DiST on both data scale and model size.

**More results on Something-Something V2 [9] and Kinetics-400 [13].** Here, we supplement more results with different frames and resolutions on two datasets in Tab. A3 and Tab. A5 for reference. From the two tables, we can draw the following conclusions: (i) The more temporal details brought by more frames is highly effective for both SSV2 and K400, regardless of model size and pre-training datasets used. For example, increasing the frames from 8 to 32 can result in consistent performance improvements of around 2.0% on SSV2 and around 1.5% on K400. This is

| Method                                     | Pre-train      | Architecture | Input Size         | TFLOPs×Cr.×Cl.           | Param (M) | Frozen | Top-1       | Top-5       |
|--------------------------------------------|----------------|--------------|--------------------|--------------------------|-----------|--------|-------------|-------------|
| TAda [10]                                  | ImageNet-1K    | ConvNeXt-T   | $32 \times 224^2$  | $0.1 \times 3 \times 2$  | 38        | ✗      | 79.1        | 93.7        |
| SlowFast [8]                               | -              | R101+NL      | $16 \times 224^2$  | $0.4 \times 3 \times 10$ | 60        | ✗      | 79.8        | 93.9        |
| TimeSformer [2]                            | ImageNet-21K   | ViT-L        | $96 \times 224^2$  | $8.4 \times 3 \times 1$  | 430       | ✗      | 80.7        | 94.7        |
| MViT [7]                                   | -              | MViT-B       | $64 \times 224^2$  | $0.5 \times 1 \times 5$  | 37        | ✗      | 81.2        | 95.1        |
| ViViT FE [1]                               | ImageNet-21K   | ViT-L        | $128 \times 224^2$ | $4.0 \times 3 \times 1$  | N/A       | ✗      | 81.7        | 93.8        |
| Video Swin [16]                            | ImageNet-21K   | Swin-L       | $32 \times 224^2$  | $0.6 \times 3 \times 4$  | 197       | ✗      | 83.1        | 95.9        |
| UnifromerV2 [14]                           | CLIP-400M+K710 | ViT-B        | $8 \times 224^2$   | $0.13 \times 1 \times 3$ | 115       | ✗      | 85.2        | 96.7        |
| ST-Adapter [18]                            | CLIP-400M      | ViT-B        | $32 \times 224^2$  | $0.61 \times 1 \times 3$ | 93        | ✓      | 82.7        | 96.2        |
| EVL [15]                                   | CLIP-400M      | ViT-B        | $32 \times 224^2$  | $0.59 \times 1 \times 3$ | 115       | ✓      | 84.2        | -           |
| DiST <sub><math>\gamma=2</math></sub> [15] | CLIP-400M      | ViT-B        | $8 \times 224^2$   | $0.16 \times 1 \times 3$ | 112       | ✓      | 83.6        | 96.3        |
| DiST <sub><math>\gamma=2</math></sub> [15] | CLIP-400M      | ViT-B        | $16 \times 224^2$  | $0.32 \times 1 \times 3$ | 112       | ✓      | 84.4        | 96.7        |
| DiST <sub><math>\gamma=2</math></sub> [15] | CLIP-400M      | ViT-B        | $32 \times 224^2$  | $0.65 \times 1 \times 3$ | 112       | ✓      | 85.0        | 97.0        |
| DiST <sub><math>\gamma=2</math></sub> [15] | CLIP-400M+K710 | ViT-B        | $8 \times 224^2$   | $0.16 \times 1 \times 3$ | 112       | ✓      | 85.1        | 96.8        |
| DiST <sub><math>\gamma=2</math></sub> [15] | CLIP-400M+K710 | ViT-B        | $16 \times 224^2$  | $0.32 \times 1 \times 3$ | 112       | ✓      | 85.8        | 97.2        |
| DiST <sub><math>\gamma=2</math></sub> [15] | CLIP-400M+K710 | ViT-B        | $32 \times 224^2$  | $0.65 \times 1 \times 3$ | 112       | ✓      | <b>86.8</b> | <b>97.5</b> |
| UnifromerV2 [14]                           | CLIP-400M+K710 | ViT-L        | $32 \times 224^2$  | $2.66 \times 2 \times 3$ | 354       | ✗      | 89.3        | 98.2        |
| TAdaFormer [11]                            | CLIP-400M+K710 | ViT-L        | $32 \times 224^2$  | $1.41 \times 4 \times 3$ | 364       | ✗      | 89.5        | -           |
| ST-Adapter [18]                            | CLIP-400M      | ViT-L        | $32 \times 224^2$  | $2.75 \times 1 \times 3$ | 347       | ✓      | 87.2        | 97.6        |
| EVL [15]                                   | CLIP-400M      | ViT-L        | $32 \times 224^2$  | $2.70 \times 1 \times 3$ | 363       | ✓      | 87.3        | -           |
| DiST <sub><math>\gamma=2</math></sub> [15] | CLIP-400M      | ViT-L        | $8 \times 224^2$   | $0.71 \times 1 \times 3$ | 343       | ✓      | 86.9        | 97.6        |
| DiST <sub><math>\gamma=2</math></sub> [15] | CLIP-400M      | ViT-L        | $16 \times 224^2$  | $1.42 \times 1 \times 3$ | 343       | ✓      | 87.6        | 97.8        |
| DiST <sub><math>\gamma=2</math></sub> [15] | CLIP-400M      | ViT-L        | $32 \times 224^2$  | $2.83 \times 1 \times 3$ | 343       | ✓      | 88.0        | 97.9        |
| DiST <sub><math>\gamma=2</math></sub> [15] | CLIP-400M+K710 | ViT-L        | $8 \times 224^2$   | $0.71 \times 1 \times 3$ | 343       | ✓      | 87.8        | 97.9        |
| DiST <sub><math>\gamma=2</math></sub> [15] | CLIP-400M+K710 | ViT-L        | $16 \times 224^2$  | $1.42 \times 1 \times 3$ | 343       | ✓      | 88.6        | 98.2        |
| DiST <sub><math>\gamma=2</math></sub> [15] | CLIP-400M+K710 | ViT-L        | $32 \times 224^2$  | $2.83 \times 1 \times 3$ | 343       | ✓      | <b>89.5</b> | <b>98.4</b> |
| X-CLIP [17]                                | CLIP-400M      | ViT-L        | $16 \times 336^2$  | $3.09 \times 3 \times 4$ | 354       | ✗      | 87.7        | 97.4        |
| BIKE [23]                                  | CLIP-400M      | ViT-L        | $32 \times 336^2$  | $3.73 \times 3 \times 4$ | 230       | ✗      | 88.6        | 98.3        |
| EVL [15]                                   | CLIP-400M      | ViT-L        | $32 \times 336^2$  | $6.07 \times 1 \times 3$ | 363       | ✓      | 87.7        | -           |
| Text4Vis [22]                              | CLIP-400M      | ViT-L        | $32 \times 336^2$  | $3.83 \times 1 \times 3$ | 231       | ✓      | 87.8        | 97.6        |
| UnifromerV2 [14]                           | CLIP-400M+K710 | ViT-L        | $32 \times 336^2$  | $6.27 \times 1 \times 3$ | 354       | ✓      | 88.8        | 98.1        |
| DiST <sub><math>\gamma=2</math></sub> [15] | CLIP-400M      | ViT-L        | $8 \times 336^2$   | $1.66 \times 1 \times 3$ | 343       | ✓      | 87.2        | 97.6        |
| DiST <sub><math>\gamma=2</math></sub> [15] | CLIP-400M      | ViT-L        | $16 \times 336^2$  | $3.32 \times 1 \times 3$ | 343       | ✓      | 87.9        | 98.0        |
| DiST <sub><math>\gamma=2</math></sub> [15] | CLIP-400M      | ViT-L        | $32 \times 336^2$  | $6.64 \times 1 \times 3$ | 343       | ✓      | 88.5        | 98.2        |
| DiST <sub><math>\gamma=2</math></sub> [15] | CLIP-400M+K710 | ViT-L        | $8 \times 336^2$   | $1.66 \times 1 \times 3$ | 343       | ✓      | 88.1        | 97.9        |
| DiST <sub><math>\gamma=2</math></sub> [15] | CLIP-400M+K710 | ViT-L        | $16 \times 336^2$  | $3.32 \times 1 \times 3$ | 343       | ✓      | 88.9        | 98.2        |
| DiST <sub><math>\gamma=2</math></sub> [15] | CLIP-400M+K710 | ViT-L        | $32 \times 336^2$  | $6.64 \times 1 \times 3$ | 343       | ✓      | <b>89.7</b> | <b>98.5</b> |

Table A5: Comparison with state-of-the-arts on Kinetics-400.

because SSV2 relies more on temporal details, while K400 depends more on spatial information. (ii) Increasing the resolution from 224 to 336 has a relatively small impact on performance, typically around 0.3%, on both datasets, which is consistent with existing literature [15]. Interestingly, using higher resolutions is apparently less effective than increasing the size of the pre-training datasets or models. Therefore, in future research, we will further explore the potential of video models from both the model and data scale perspectives.

## 2. Implementation details

Tab. A6 summarizes the fine-tuning configurations across multiple datasets and models. In almost all the different datasets and models, the configurations are shared, which demonstrates the extensive adaptability of our proposed DiST.

## References

- [1] Anurag Arnab, Mostafa Dehghani, Georg Heigold, Chen Sun, Mario Lučić, and Cordelia Schmid. Vivit: A video vision transformer. In *ICCV*, pages 6836–6846, 2021. 2, 3

| dataset backbone                      | Kinetics-400                                                       |           | Something-Something V2 |           | Epic-Kitchens 100 |           |
|---------------------------------------|--------------------------------------------------------------------|-----------|------------------------|-----------|-------------------|-----------|
|                                       | ViT-B                                                              | ViT-L     | ViT-B                  | ViT-L     | ViT-B             | ViT-L     |
| $\alpha$ (dim. of integration branch) | 1/2 (384)                                                          | 3/8 (384) | 1/2 (384)              | 3/8 (384) | 1/2 (384)         | 3/8 (384) |
| $\beta$ (dim. of temporal encoder)    | 1/8 (96)                                                           | 3/32 (96) | 1/8 (96)               | 3/32 (96) | 1/8 (96)          | 3/32 (96) |
| $\gamma$ (frames of temporal encoder) | 2                                                                  |           |                        |           |                   |           |
| optimizer                             | AdamW, learning rate=3.2e-4, weight decay=1e-4, betas=[0.9, 0.999] |           |                        |           |                   |           |
| batch size                            | 256                                                                |           |                        |           |                   |           |
| training epochs                       | 36                                                                 |           |                        |           |                   |           |
| warmup epochs                         | 6                                                                  |           |                        |           |                   |           |
| training crop scale                   | [0.4, 1.0]                                                         |           |                        |           |                   |           |
| training crop size                    | 224                                                                |           |                        |           |                   |           |
| frame sampling rate                   | TSN [20] uniform sampling                                          |           |                        |           |                   |           |
| mirror                                | ✓                                                                  |           |                        |           |                   |           |
| RandAugment [6]                       | ✗                                                                  |           |                        |           |                   |           |
| MixUp [26]                            | 0.8                                                                |           |                        |           |                   |           |
| CutMix [25]                           | 1.0                                                                |           |                        |           |                   |           |
| testing views                         | 3 temporal $\times$ 1 spatial                                      |           |                        |           |                   |           |

Table A6: Configurations for Kinetics-400, Something-Something V2 and Epic-Kitchens 100.

- [2] Gedas Bertasius, Heng Wang, and Lorenzo Torresani. Is space-time attention all you need for video understanding? In *ICML*, volume 2, page 4, 2021. 1, 3
- [3] Adrian Bulat, Juan Manuel Perez Rua, Swathikiran Sudhakaran, Brais Martinez, and Georgios Tzimiropoulos. Space-time mixing attention for video transformer. *NeurIPS*, 34:19594–19607, 2021. 1
- [4] Joao Carreira, Eric Noland, Andras Banki-Horvath, Chloe Hillier, and Andrew Zisserman. A short note about kinetics-600. *arXiv preprint arXiv:1808.01340*, 2018. 2
- [5] Joao Carreira, Eric Noland, Chloe Hillier, and Andrew Zisserman. A short note on the kinetics-700 human action dataset. *arXiv preprint arXiv:1907.06987*, 2019. 2
- [6] Ekin D Cubuk, Barret Zoph, Jonathon Shlens, and Quoc V Le. Randaugment: Practical automated data augmentation with a reduced search space. In *CVPR Workshops*, pages 702–703, 2020. 4
- [7] Haoqi Fan, Bo Xiong, Karttikeya Mangalam, Yanghao Li, Zhicheng Yan, Jitendra Malik, and Christoph Feichtenhofer. Multiscale vision transformers. In *ICCV*, pages 6824–6835, 2021. 2, 3
- [8] Christoph Feichtenhofer, Haoqi Fan, Jitendra Malik, and Kaiming He. Slowfast networks for video recognition. In *ICCV*, pages 6202–6211, 2019. 2, 3
- [9] Raghav Goyal, Samira Ebrahimi Kahou, Vincent Michalski, Joanna Materzynska, Susanne Westphal, Heuna Kim, Valentin Haenel, Ingo Fruend, Peter Yianilos, Moritz Mueller-Freitag, et al. The” something something” video database for learning and evaluating visual common sense. In *ICCV*, pages 5842–5850, 2017. 2
- [10] Ziyuan Huang, Shiwei Zhang, Liang Pan, Zhiwu Qing, Mingqian Tang, Ziwei Liu, and Marcelo H Ang Jr. Tada! temporally-adaptive convolutions for video understanding. In *ICLR*, 2022. 2, 3
- [11] Ziyuan Huang, Shiwei Zhang, Liang Pan, Zhiwu Qing, Yingya Zhang, Ziwei Liu, and Marcelo H Ang Jr. Temporally-adaptive models for efficient video understanding. *arXiv preprint arXiv:2308.05787*, 2023. 2, 3
- [12] H Jhuang, H Garrote, E Poggio, T Serre, and T Hmdb. A large video database for human motion recognition. In *ICCV*, volume 4, page 6, 2011. 2
- [13] Will Kay, Joao Carreira, Karen Simonyan, Brian Zhang, Chloe Hillier, Sudheendra Vijayanarasimhan, Fabio Viola, Tim Green, Trevor Back, Paul Natsev, et al. The kinetics human action video dataset. *arXiv preprint arXiv:1705.06950*, 2017. 2
- [14] Kunchang Li, Yali Wang, Yanan He, Yizhuo Li, Yi Wang, Limin Wang, and Yu Qiao. Uniformerv2: Spatiotemporal learning by arming image vits with video uniformer. *arXiv preprint arXiv:2211.09552*, 2022. 2, 3
- [15] Ziyi Lin, Shijie Geng, Renrui Zhang, Peng Gao, Gerard de Melo, Xiaogang Wang, Jifeng Dai, Yu Qiao, and Hongsheng Li. Frozen clip models are efficient video learners. In *ECCV*, pages 388–404. Springer, 2022. 1, 2, 3
- [16] Ze Liu, Jia Ning, Yue Cao, Yixuan Wei, Zheng Zhang, Stephen Lin, and Han Hu. Video swin transformer. In *CVPR*, pages 3202–3211, 2022. 2, 3
- [17] Bolin Ni, Houwen Peng, Minghao Chen, Songyang Zhang, Gaofeng Meng, Jianlong Fu, Shiming Xiang, and Haibin Ling. Expanding language-image pretrained models for general video recognition. In *ECCV*, pages 1–18. Springer, 2022. 2, 3
- [18] Juntao Pan, Ziyi Lin, Xiatian Zhu, Jing Shao, and Hongsheng Li. Parameter-efficient image-to-video transfer learning. *arXiv e-prints*, pages arXiv–2206, 2022. 1, 2, 3
- [19] Khurram Soomro, Amir Roshan Zamir, and Mubarak Shah. Ucf101: A dataset of 101 human actions classes from videos in the wild. *arXiv preprint arXiv:1212.0402*, 2012. 2

- [20] Limin Wang, Yuanjun Xiong, Zhe Wang, Yu Qiao, Dahua Lin, Xiaoou Tang, and Luc Van Gool. Temporal segment networks: Towards good practices for deep action recognition. In *ECCV*, pages 20–36. Springer, 2016. 4
- [21] Mengmeng Wang, Jiazheng Xing, and Yong Liu. Actionclip: A new paradigm for video action recognition. *arXiv preprint arXiv:2109.08472*, 2021. 2
- [22] Wenhao Wu, Zhun Sun, and Wanli Ouyang. Revisiting classifier: Transferring vision-language models for video recognition. In *AAAI*, volume 37, pages 2847–2855, 2023. 3
- [23] Wenhao Wu, Xiaohan Wang, Haipeng Luo, Jingdong Wang, Yi Yang, and Wanli Ouyang. Bidirectional cross-modal knowledge exploration for video recognition with pre-trained vision-language models. In *CVPR*, pages 6620–6630, 2023. 3
- [24] Shen Yan, Xuehan Xiong, Anurag Arnab, Zhichao Lu, Mi Zhang, Chen Sun, and Cordelia Schmid. Multiview transformers for video recognition. In *CVPR*, pages 3333–3343, 2022. 2
- [25] Sangdoon Yun, Dongyoon Han, Seong Joon Oh, Sanghyuk Chun, Junsuk Choe, and Youngjoon Yoo. Cutmix: Regularization strategy to train strong classifiers with localizable features. In *ICCV*, pages 6023–6032, 2019. 4
- [26] Hongyi Zhang, Moustapha Cisse, Yann N Dauphin, and David Lopez-Paz. mixup: Beyond empirical risk minimization. *arXiv preprint arXiv:1710.09412*, 2017. 4
